# Supplementary material for: Structural and luminescence studies of nickel(ii) and copper(ii) complexes with (1R,2R)-cyclohexanediamine derived unsymmetric Schiff base
Source: Royal Society of Chemistry journal article supplement (doi:10.1039/c1dt10882d), 2011-01-01
Supplement: c1dt10882d_2.pdf [file c1dt10882d_2.pdf]

## Hydrogen bonds

| Ligand                         |         |           |           |              |
|--------------------------------|---------|-----------|-----------|--------------|
| D-H...A                        | D-H [Å] | H...A [Å] | D...A [Å] | ∠D-H...A [°] |
| O1-H1...N1                     | 0.82    | 1.87      | 2.595     | 147          |
| O2-H2...N2                     | 0.82    | 1.89      | 2.615     | 147          |
| C4"-H4"...O1[-1/2+x,1/2-y,1-z] | 0.93    | 2.49      | 2.947     | 111          |
|                                |         |           |           |              |
| <b>Complex</b>                 |         |           |           |              |
| O1W-H2D...O2W                  | 0.87    | 0.75      | 1.323     | 109          |
| C1'A-H1'A...O1B                | 1.00    | 2.52      | 3.305     | 135          |
| C4AA-H4AA...O3W[1/2+x,1/2+y,z] | 0.95    | 2.46      | 3.377     | 162          |
| C1"B-H1"B...O1A                | 1.00    | 2.58      | 3.468     | 148          |
| C1'B-H1'B...O2A[x,-1+y,z]      | 1.00    | 2.50      | 3.430     | 155          |

## Ring Puckering Analysis

### Ligand

Cg1: C1-C9(naph1)

Cg4: C5-C10(naph2)

### Complex

Cg6: Cu1-N2a-O2a

Cg9: C1a-C9a(naph)

Cg13: Cu2-N2b-O2b

Cg16: C1b-C9b(naph)

Cg2: C1'-C2'

Cg5: C1-C7(naph)

Cg7: C1aa-C6aa(phenyl)

Cg10: C1a-C9a(naph1)

Cg14: C1ab-C6ab(phenyl)

Cg17: C1b-C9b(naph1)

Cg3: C1a-C6a(phenyl)

Cg8: Cu1-N1a-O1a

Cg11: C5a-c10a(naph2)

Cg15: Cu2-O1b-N1b

Cg18: C5b-C10b(naph2)

| Ligand                        |           |           |              |              |
|-------------------------------|-----------|-----------|--------------|--------------|
| Cg(I) -> Cg(J)                | Cg-Cg [Å] | Alpha [°] | CgI_Perp [Å] | CgJ_Perp [Å] |
| Cg1 -> Cg3                    | 4.170     | 18.31     | 4.0736       | 3.8544       |
| Cg3 -> Cg3[1-X,-1/2+Y,1/2-Z]  | 5.923     | 83        | 2.4299       | -4.4832      |
| Cg3 -> Cg4                    | 4.115     | 16.7      | 3.8823       | 3.7798       |
| Cg3 -> Cg4[1-X,-1/2+Y,1/2-Z]  | 5.763     | 80.4      | 2.8182       | -4.9974      |
| Cg4 -> Cg3[-1+X,Y,Z]          | 5.816     | 16.7      | -1.6023      | -2.9626      |
|                               |           |           |              |              |
| <b>Complex</b>                |           |           |              |              |
| Cg6 -> Cg13                   | 5.349     | 4.2       | 3.131        | -3.480       |
| Cg6 -> Cg13[X,1+Y,Z]          | 4.679     | 4.2       | -3.434       | 2.815        |
| Cg6 -> Cg15                   | 3.321     | 6.8       | 3.436        | -3.621(4)    |
| Cg6 -> Cg15[X,1+Y,Z]          | 4.566     | 6.8       | -3.221       | 2.674        |
| Cg6 -> Cg17                   | 3.860     | 5.1       | 3.418        | -3.944       |
| Cg6 -> Cg18                   | 5.037     | 34.8      | 1.321        | -3.801       |
| Cg7 -> Cg15                   | 4.561     | 5.4       | 3.656        | -3.597       |
| Cg7 -> Cg15[X,1+Y,Z]          | 4.799     | 5.4       | -3.001       | 2.786        |
| Cg7 -> Cg17                   | 4.227     | 3.7       | 3.675        | -3.889       |
| Cg7 -> Cg18                   | 4.015     | 34.4      | 0.222        | -3.772       |
| Cg8 -> Cg11[3/2-X,1/2+Y,2-Z]  | 5.825     | 67.1      | 5.397        | 4.890        |
| Cg8 -> Cg13                   | 3.449     | 5.5       | 3.336        | -3.461       |
| Cg8 -> Cg13[X,1+Y,Z]          | 4.428     | 5.5       | -3.228       | 2.751        |
| Cg8 -> Cg14                   | 4.408     | 17.7      | 3.372        | -3.516       |
| Cg8 -> Cg14[X,1+Y,Z]          | 4.851     | 17.7      | -3.758       | 2.696        |
| Cg8 -> Cg15                   | 4.676     | 8.0       | 3.705        | -3.610       |
| Cg10 -> Cg10[3/2-X,1/2+Y,2-Z] | 5.531     | 51.0      | 1.414        | 8.286        |
| Cg10 -> Cg11[3/2-X,1/2+Y,2-Z] | 4.886     | 59.1      | 3.213        | 8.014        |
| Cg10 -> Cg13                  | 3.846     | 5.5       | 3.408        | -0.002       |
| Cg10 -> Cg14                  | 3.836     | 6.8       | 3.134        | 0.061        |
| Cg10 -> Cg14[X,1+Y,Z]         | 5.943     | 6.8       | -3.996       | 6.934        |

|                                |       |      |        |        |
|--------------------------------|-------|------|--------|--------|
| Cg11 -> Cg10[3/2-X,1/2+Y,2-Z]  | 5.005 | 59.1 | 1.142  | 9.465  |
| Cg11 -> Cg11[3/2-X,1/2+Y,2-Z]  | 5.511 | 70.0 | 2.391  | 8.642  |
| Cg11 -> Cg13                   | 5.180 | 14.9 | 3.473  | 0.467  |
| Cg11 -> Cg14                   | 3.807 | 14.9 | 3.399  | 1.123  |
| Cg15 -> Cg18[3/2-X,-1/2+Y,1-Z] | 5.795 | 79.4 | -5.770 | -4.570 |
| Cg17 -> Cg17[3/2-X,-1/2+Y,1-Z] | 5.564 | 60.0 | 1.565  | -5.018 |
| Cg17 -> Cg18[3/2-X,-1/2+Y,1-Z] | 4.674 | 79.8 | -3.386 | -4.630 |
| Cg18 -> Cg15                   | 4.313 | 33.1 | -0.002 | -1.071 |
| Cg18 -> Cg17[3/2-X,-1/2+Y,1-Z] | 5.055 | 79.8 | 1.953  | -7.831 |
| Cg18 -> Cg18[3/2-X,-1/2+Y,1-Z] | 5.320 | 71.0 | -1.850 | -6.296 |

Cg(I) = Plane number I (= ring number in () above); Cg-Cg = Distance between ring Centroids (Ang.); Alpha = Dihedral Angle between Planes I and J (Deg); CgI\_Perp = Perpendicular distance of Cg(I) on ring J (Ang.); CgJ\_Perp = Perpendicular distance of Cg(J) on ring I (Ang.)

### X-H... $\pi$ Interactions ( $H...Cg < 3.0 \text{ \AA}$ and $\text{Gamma} < 30.0 \text{ Deg}$ )

| Ligand                            |                         |                    |                           |                         |                         |
|-----------------------------------|-------------------------|--------------------|---------------------------|-------------------------|-------------------------|
| X-H...Cg                          | H...Cg [ $\text{\AA}$ ] | Gamma [ $^\circ$ ] | X-H...Cg [ $\text{\AA}$ ] | X...Cg [ $\text{\AA}$ ] | X-H, $\pi$ [ $^\circ$ ] |
| C1'-H1'...Cg1[1/2+X,1/2-Y,1-Z]    | 2.84                    | 2.20               | 176                       | 3.813                   | 88                      |
| C2"-H2"B...Cg4[1/2+X,1/2-Y,1-Z]   | 2.80                    | 2.56               | 177                       | 3.774                   | 89                      |
| <b>Complex</b>                    |                         |                    |                           |                         |                         |
| C1"A -H1"A [1] -> Cg13[X,1+Y,Z]   | 2.36                    | 8.88               | 158                       | 3.312                   | 69                      |
| C4A-H4A -> Cg11[3/2-X,-1/2+Y,2-Z] | 2.88                    | 18.52              | 149                       | 3.722                   | 59                      |
| C5A-H5A -> Cg10[3/2-X,-1/2+Y,2-Z] | 2.72                    | 3.70               | 148                       | 3.561                   | 57                      |
| C5B-H5B -> Cg17[3/2-X,1/2+Y,1-Z]  | 2.62                    | 9.07               | 142                       | 3.419                   | 60                      |
| C2"B-H2"3 -> Cg7[X,-1+Y,Z]        | 2.96                    | 7.17               | 160                       | 3.907                   | 66                      |
| C1'B-H1'B -> Cg6 [X,-1+Y,Z]       | 2.47                    | 9.29               | 160                       | 3.429                   | 68                      |

Gamma = Angle Cg(I)->Cg(J) vector and normal to plane J (Deg);

### Ring-Metal Interactions with $Cg-Me < 4.0 \text{ \AA}$

| Complex        |                              |                             |                   |
|----------------|------------------------------|-----------------------------|-------------------|
| Cg(I) -> Me(J) | Cg(I)-Me(J) [ $\text{\AA}$ ] | Me(J)_Perp [ $\text{\AA}$ ] | Beta [ $^\circ$ ] |
| Cg8 -> Cu2     | 3.647                        | -3.530                      | 23.62             |
| Cg15 -> Cu1    | 3.545                        | 3.518                       | 20.38             |

Beta = Angle Cg(I)->Cg(J) or Cg(I)->Me vector and normal to plane I (Deg);
